# Supplementary material for: Valorisation of food waste with distinct carbon-to-nitrogen ratios by the microalga Isochrysis galbana: laboratory demonstration and techno-economic assessment
Source: Royal Society of Chemistry journal article supplement (doi:10.1039/d4se01072h), 2024-01-01
Supplement: d4se01072h1.pdf [file d4se01072h1.pdf]

**Valorisation of Food Waste with Distinct Carbon-to-Nitrogen Ratios by the Microalga *Isochrysis galbana*: Laboratory Demonstration and Techno-Economic Assessment**

Xu Zeng<sup>a</sup>, Zhi-yuan Zhao<sup>b</sup>, Gui-meng Wang<sup>a</sup>, Derek M. Ayittey<sup>a</sup>, Jia-Le Zhu<sup>a,c</sup>, Zhi-gang Zhou<sup>a</sup>, Kin-chung Ho<sup>d</sup>, Carol Sze Ki Lin<sup>c\*</sup>, and Zheng Sun<sup>a,e\*</sup>

<sup>a</sup> Key Laboratory of Exploration and Utilization of Aquatic Genetic Resources, Ministry of Education; International Research Center for Marine Biosciences, Ministry of Science and Technology; National Demonstration Centre for Experimental Fisheries Science Education, Shanghai Ocean University, Shanghai, 201306, China

<sup>b</sup> College of Economics and Management, Shanghai Ocean University, Shanghai, 201306, China

<sup>c</sup> School of Energy and Environment, City University of Hong Kong, Tat Chee Avenue, Kowloon, Hong Kong

<sup>d</sup> College of Marine Ecology and Environment, Shanghai Ocean University, Shanghai, 201306, China

<sup>e</sup> Marine Biomedical Science and Technology Innovation Platform of Lin-gang Special Area, Shanghai, 201306, China

**\*Corresponding authors:**

Prof. Carol Sze Ki Lin, E-mail: [carollin@cityu.edu.hk](mailto:carollin@cityu.edu.hk)

Prof. Zheng Sun, E-mail: [zsun@shou.edu.cn](mailto:zsun@shou.edu.cn)

**Table S1. Composition of f/2 culture medium.**

| Component                                                         | Additives per 1,000 mL of filtered<br>natural seawater* |
|-------------------------------------------------------------------|---------------------------------------------------------|
| NaNO <sub>3</sub>                                                 | 74.8 mg                                                 |
| NaH <sub>2</sub> PO <sub>4</sub>                                  | 4.4 mg                                                  |
| ZnSO <sub>4</sub> •4H <sub>2</sub> O                              | 23 mg                                                   |
| MnCl <sub>3</sub> •4H <sub>2</sub> O                              | 17.8 mg                                                 |
| CuSO <sub>4</sub> •5H <sub>2</sub> O                              | 10 mg                                                   |
| Na <sub>2</sub> MoO <sub>4</sub> •2H <sub>2</sub> O               | 7.3 mg                                                  |
| CoCl <sub>2</sub> •6H <sub>2</sub> O                              | 12 mg                                                   |
| FeC <sub>6</sub> H <sub>5</sub> O <sub>7</sub> •5H <sub>2</sub> O | 3.9 g                                                   |
| Na <sub>2</sub> EDTA                                              | 4.35 g                                                  |
| Vitamin B <sub>1</sub>                                            | 0.1 mg                                                  |
| Vitamin B <sub>12</sub>                                           | 5×10 <sup>-4</sup> mg                                   |
| Vitamin H                                                         | 5×10 <sup>-4</sup> mg                                   |

\* Filtered natural seawater was used in the experiment, with a salinity of 30‰.
